# Supplementary material
Source: PubMed Central journal article supplement (PMC4631039)
Supplement: chest_148_5_1242_ds01.pdf [file chest_148_5_1242_ds01.pdf]

## Who Gets Early Tracheostomy?

### Evidence of Unequal Treatment at 185 Academic Medical Centers

Joshua J. Shaw, MD; and Heena P. Santry, MD

CHEST 2015; 148(5):1242–1250

**e-Table 1.**

| Code | Description                        |
|------|------------------------------------|
| 1    | Congestive Heart Failure           |
| 2    | Valvular Disease                   |
| 3    | Pulmonary Circulation Disease      |
| 4    | Peripheral vascular disease        |
| 5    | Hypertension                       |
| 6    | Paralysis                          |
| 7    | Other neurological disorders       |
| 8    | Chronic pulmonary disease          |
| 9    | Diabetes w/o CCs                   |
| 10   | Diabetes w/CCs                     |
| 11   | Hypothyroidism                     |
| 12   | Renal Failure                      |
| 13   | Liver Disease                      |
| 14   | Peptic Ulcer Disease               |
| 15   | HIV/AIDS                           |
| 16   | Lymphoma                           |
| 17   | Metastatic Cancer                  |
| 18   | Solid Tumor w/o Metastatic Disease |
| 19   | Rheumatologic Disorder             |
| 20   | Coagulopathy                       |
| 21   | Obesity                            |
| 22   | Weight Loss                        |
| 23   | Fluid and/or Electrolyte Disorder  |
| 24   | Chronic Blood Loss Anemia          |
| 25   | Deficiency Anemias                 |
| 26   | Alcohol Abuse                      |
| 27   | Drug Abuse                         |
| 28   | Psychoses                          |
| 29   | Depression                         |

*Online supplements are not copyedited prior to posting.*
